# Supplementary material for: Bulk segregant analysis-sequencing and RNA-Seq analyses reveal candidate genes associated with albino phenotype in Brassica napus
Source: Front Plant Sci. 2022 Sep 2;13:994616. doi: 10.3389/fpls.2022.994616 (PMC9478516; doi:10.3389/fpls.2022.994616)
Supplement: Supplementary file 2 [file Data_Sheet_2.xlsx]

## Sheet: Table S1
Table S1 The temperature during the time of rapeseed plant growth in Wuhan, Hubei province
Date	Days after sowing	Maximum temperature (°C)	Minimum temperature (°C)	Mean temperature (°C)
2017-10-06	1	21	16	18.5
2017-10-07	2	27	18	22.5
2017-10-08	3	29	21	25
2017-10-09	4	31	20	25.5
2017-10-10	5	24	14	19
2017-10-11	6	15	12	13.5
2017-10-12	7	14	12	13
2017-10-13	8	17	14	15.5
2017-10-14	9	20	14	17
2017-10-15	10	19	14	16.5
2017-10-16	11	16	14	15
2017-10-17	12	17	13	15
2017-10-18	13	17	13	15
2017-10-19	14	18	12	15
2017-10-20	15	21	11	16
2017-10-21	16	22	11	16.5
2017-10-22	17	22	13	17.5
2017-10-23	18	20	11	15.5
2017-10-24	19	22	12	17
2017-10-25	20	20	13	16.5
2017-10-26	21	13	0	6.5
2017-10-27	22	11	0	5.5
2017-10-28	23	12	0	6
2017-10-29	24	7	0	3.5
2017-10-30	25	18	7	12.5
2017-10-31	26	20	8	14
2017-11-01	27	22	9	15.5
2017-11-02	28	23	10	16.5
2017-11-03	29	24	9	16.5
2017-11-04	30	20	8	14
2017-11-05	31	20	8	14
2017-11-06	32	21	9	15
2017-11-07	33	22	11	16.5
2017-11-08	34	23	10	16.5
2017-11-09	35	23	12	17.5
2017-11-10	36	19	10	14.5
2017-11-11	37	15	11	13
2017-11-12	38	15	10	12.5
2017-11-13	39	13	9	11
2017-11-14	40	17	8	12.5
2017-11-15	41	18	9	13.5
2017-11-16	42	19	14	16.5
2017-11-17	43	15	7	11
2017-11-18	44	10	4	7
2017-11-19	45	9	4	6.5
2017-11-20	46	12	3	7.5
2017-11-21	47	13	6	9.5
2017-11-22	48	13	3	8
2017-11-23	49	15	5	10
2017-11-24	50	17	3	10
2017-11-25	51	17	3	10
2017-11-26	52	18	3	10.5
2017-11-27	53	18	4	11
2017-11-28	54	16	7	11.5
2017-11-29	55	14	3	8.5
2017-11-30	56	9	4	6.5
2017-12-01	57	10	4	7
2017-12-02	58	13	5	9
2017-12-03	59	13	3	8
2017-12-04	60	13	1	7
2017-12-05	61	12	0	6
2017-12-06	62	13	2	7.5
2017-12-07	63	12	0	6
2017-12-08	64	11	0	5.5
2017-12-09	65	12	1	6.5
2017-12-10	66	13	0	6.5
2017-12-11	67	14	0	7
2017-12-12	68	13	1	7
2017-12-13	69	8	4	6
2017-12-14	70	7	3	5
2017-12-15	71	6	0	3
2017-12-16	72	9	-4	2.5
2017-12-17	73	8	-4	2
2017-12-18	74	10	-3	3.5
2017-12-19	75	11	-2	4.5
2017-12-20	76	13	-3	5
2017-12-21	77	15	-2	6.5
2017-12-22	78	16	0	8
2017-12-23	79	14	4	9
2017-12-24	80	13	-1	6
2017-12-25	81	14	-1	6.5
2017-12-26	82	15	-1	7
2017-12-27	83	13	1	7
2017-12-28	84	10	2	6
2017-12-29	85	14	4	9
2017-12-30	86	13	-1	6
2017-12-31	87	13	0	6.5
2018-01-01	88	11	4	7.5
2018-01-02	89	9	4	6.5
2018-01-03	90	5	0	2.5
2018-01-04	91	1	-2	-0.5
2018-01-05	92	1	-2	-0.5
2018-01-06	93	1	-1	0
2018-01-07	94	1	-1	0
2018-01-08	95	4	-7	-1.5
2018-01-09	96	7	-6	0.5
2018-01-10	97	11	-5	3
2018-01-11	98	11	-6	2.5
2018-01-12	99	10	-4	3
2018-01-13	100	9	0	4.5
2018-01-14	101	12	0	6
2018-01-15	102	11	0	5.5
2018-01-16	103	9	1	5
2018-01-17	104	11	1	6
2018-01-18	105	8	3	5.5
2018-01-19	106	9	3	6
2018-01-20	107	8	4	6
2018-01-21	108	8	0	4
2018-01-22	109	10	2	6
2018-01-23	110	9	2	5.5
2018-01-24	111	2	-1	0.5
2018-01-25	112	0	-2	-1
2018-01-26	113	0	-3	-1.5
2018-01-27	114	-2	-5	-3.5
2018-01-28	115	0	-6	-3
2018-01-29	116	2	-8	-3
2018-01-30	117	4	-7	-1.5
2018-01-31	118	6	-4	1
2018-02-01	119	7	-4	1.5
2018-02-02	120	6	-5	0.5
2018-02-03	121	7	-4	1.5
2018-02-04	122	5	-4	0.5
2018-02-05	123	8	-5	1.5
2018-02-06	124	10	-5	2.5
2018-02-07	125	9	-2	3.5
2018-02-08	126	10	-3	3.5
2018-02-09	127	12	5	8.5
2018-02-10	128	10	-2	4
2018-02-11	129	10	-2	4
2018-02-12	130	12	-1	5.5
2018-02-13	131	16	1	8.5
2018-02-14	132	15	7	11
2018-02-15	133	12	4	8
2018-02-16	134	14	3	8.5
2018-02-17	135	16	7	11.5
2018-02-18	136	8	4	6
2018-02-19	137	6	4	5
2018-02-20	138	6	3	4.5
2018-02-21	139	8	3	5.5
2018-02-22	140	12	2	7
2018-02-23	141	16	5	10.5
2018-02-24	142	15	4	9.5
2018-02-25	143	14	3	8.5
2018-02-26	144	17	6	11.5

## Sheet: Table S2
Table S2 Primers used in the study
Purpose	Primer name	Primer sequence
		Forward (5' to 3')	Reverse( 5' to 3' )
qRT-PCR	BnaActin7p	CTATCCTCCGTCTCGATCTCGC	CTTAGCCGTCTCCAGCTCTTGC
	PORp	AGAACTTAGCGTGAGAAATGTAGC	CTGCGCTGTAGGTAGGTTCTT
	LHCA1p	CTGCTCCTGGGGACTTTG	CTGCCCATTCTTGTGCCTTA
	LHCA2p	TTCTCCTAGTTTCTTGTGTGGC	CAGTGAACTATCTCTGCTTGTACGT
	LHCB4p	ACCAGAACTTAGCCAAGAACATAGC	ACAAACGCTTCTCTGAGTCCAA
	PETFp	CACCGTAAGCACCTCCTTCC	CGCGTCGAGGACGTATGTG
	PETEp	GGAATGCGATGGCCATTGAGATAC	AGTAGAAACTGTAAGAGCCAGGCT
	PSBQp	AACAGATAACTCAGACCAAGCCA	AACGTACGGCCAAGCTTTT
	PSAGp	CCTCCTCTGCCTTACCCAA	CCCAAGCAAGAACATCAACAAT

## Sheet: Table S3
Table S3 Statistics of yield-related traits between white-leaf WL and green-leaf GL
Sample ID	Plant height (cm)	Length of main inflorescence (cm)	Number of primary branches	Silique number per plant	Silique length (cm)	Seed number per silique	Thousand seed weight (g)	Seed yield per plant (g)
GL	176.2±16.5**	110.6±13.1**	8.4±1.14	490.4±154.8**	4.3±0.4**	15.4±2.5**	2.4±1	14.1±0.6**
WL	110.4±13.5	77.4±17.6	9.2±1.1	247.8±88.7	2.8±0.3	5.9±3.1	3.0±0.4	2.3±0.3
Two asterisks indicate significant differences at P < 0.01 level using Student’s t-test

## Sheet: Table S4
Table S4 Statistics of BSA-Seq data
ID	Total Reads	Total Base	Clean Reads	Clean Base	Q20 ratio	Q30 ratio	GC content	Cov ratio
Green pool	271693354	40754003100	265742186	39770316374	0.978549	0.949195	0.373684	0.961187
White pool	287954676	43193201400	281350098	42102884790	0.978288	0.949105	0.374528	0.96402
2127	126983688	19047553200	124040546	18564085120	0.978665	0.950292	0.3748	0.991471
WL	154451666	23167749900	151109808	22617242914	0.978378	0.948988	0.37725	0.907645

## Sheet: Table S5
Table S5 Candidate regions by BSA-Seq analysis
Chromosome	Start	End	Length	nSNPs	avgSNPs_Mb	peakDeltaSNP	posPeakDeltaSNP	avgDeltaSNP
no2127v0_A03	10907036	12747979	1840943	1023	556	-0.365232	12377132	-0.358897
no2127v0_A07	11915880	16012796	4096916	3033	740	-0.337659	14679086	-0.319192
no2127v0_A08	9750	3684771	3675021	1480	403	-0.327988	9750	-0.31801
no2127v0_A08	3968026	14135287	10167261	1141	112	-0.381212	10829943	-0.342588
no2127v0_C03	241757	410288	168531	111	659	0.533307	241757	0.533302
no2127v0_C03	44048499	55016899	10968400	1801	164	-0.374574	52217928	-0.351982
no2127v0_C04	49711475	49970573	259098	109	421	-0.314901	49970573	-0.311374
no2127v0_C04	50081013	52272855	2191842	926	422	-0.358993	51349172	-0.334748
no2127v0_C04	66065124	68371176	2306052	2728	1183	-0.370274	68371176	-0.348651
no2127v0_C06	15751921	22005644	6253723	2989	478	-0.409704	18236625	-0.364287
no2127v0_C06	39561415	39755245	193830	48	248	-0.314964	39755245	-0.309878
no2127v0_C06	39886686	44773888	4887202	1628	333	-0.362797	42835522	-0.349135
no2127v0_C07	54685978	59774146	5088168	5425	1066	-0.33799	56215795	-0.334808

## Sheet: Table S6
Table S6 Statistics of RNA-Seq data
Samplesa	Clean Reads Pairs	Clean base(G)	Total mapped reads
GL-1	22064107	6.16464	17,212,347 (78.01%)
GL-2	22147045	6.18781	17,203,563 (77.68%)
GL-3	22315983	6.23501	17,242,760 (77.27%)
WGL-1	22046936	6.15984	17,801,582 (80.74%)
WGL-2	22646932	6.32748	18,265,391 (80.65%)
WGL-3	22476120	6.27976	17,622,582 (78.41%)
WL-1	22346167	6.24345	17,841,971 (79.84%)
WL-2	22136732	6.18493	17,165,823 (77.54%)
WL-3	22458578	6.27485	17,344,132 (77.23%)
a: GL-1, GL-2 and GL-3 represent three biological replicates of GL;WGL-1, WGL-2 and WGL-3 represent three biological replicates of WGL; WL-1, WL-2 and WL-3 represent three biological replicates of WL.

## Sheet: Table S7
Table S7 Putative DEGs related to chloroplast development
geneID	class	FPKM			log2FC(WL/GL)	padj(WL/GL)	up/down(WL/GL)	log2FC(WL/WGL)	padj(WL/WGL)	up/down(WL/WGL)	NR_def	GO_ID	GO_term	KO_ID	KO_gene	Hyperlink	KEGG Pathway	Pathway ID	Kog_Annotation	Swiss-Prot_Id	Swiss-Prot_Annotation
		GL	WGL	WL
BnaA02G0237700NO	ribosomal protein	2.84333	19.48	64.2033	3.89085	1.69e-17	Up	1.35377	0.00652421	Up	ribosomal protein L7-1-like [Brassica napus]	-	-	K02937	RP-L7e,RPL7	http://www.genome.jp/dbget-bin/www_bget?ko:K02937	Ribosome	ko03010	KOG3184(J)(60S ribosomal protein L7)	60S	60S ribosomal protein L7-1 OS=Arabidopsis thaliana GN=RPL7A PE=2 SV=1
BnaA07G0222600NO		2.55667	11.0633	46.2433	3.54032	1.98e-10	Up	1.72379	0.00199012	Up	protein BRARA_G02051 [Brassica rapa]	-	-	K02937	RP-L7e,RPL7	http://www.genome.jp/dbget-bin/www_bget?ko:K02937	Ribosome	ko03010	KOG3184(J)(60S ribosomal protein L7)	60S	60S ribosomal protein L7-1 OS=Arabidopsis thaliana GN=RPL7A PE=2 SV=1
BnaA02G0226100NO		5.24667	27.9367	100.29	3.63492	5.26e-24	Up	1.51379	0.00117226	Up	XP_013708408.1 small ribosomal subunit protein S13, mitochondrial-like [Brassica napus] &gt;XP_013718489.1 small ribosomal subunit protein S13, mitochondrial-like [Brassica napus];ribosomal subunit protein S13, mitochondrial [Eutrema salsugineum] &gt	GO:0005622;GO:0003676;GO:0009507;GO:0042254;GO:0005763;GO:0006412;GO:0005840;GO:0015935;GO:0019843;GO:0003723;GO:0003735;GO:0030529;GO:0005739	intracellular;nucleic acid binding;chloroplast;ribosome biogenesis;mitochondrial small ribosomal subunit;translation;ribosome;small ribosomal subunit;rRNA binding;RNA binding;structural constituent of ribosome;intracellular ribonucleoprotein complex;mitochondrion	K02952	RP-S13,rpsM	http://www.genome.jp/dbget-bin/www_bget?ko:K02952	Ribosome	ko03010	KOG3311(J)(Ribosomal protein S18)	Small	Small ribosomal subunit protein S13, mitochondrial OS=Arabidopsis thaliana GN=RPS13 PE=2 SV=1
novel.40862		5.44333	2.62333	54.7067	2.75773	1.22431e-06	Up	4.1845	1.29668e-09	Up	protein (mitochondrion) [Vicia faba] &gt;AGC79007.1 hypothetical protein (mitochondrion) [Vicia faba]	-	-	K02982	RP-S3,rpsC	http://www.genome.jp/dbget-bin/www_bget?ko:K02982	Ribosome	ko03010	-	Ribosomal	Ribosomal protein S3, mitochondrial OS=Arabidopsis thaliana GN=RPS3 PE=2 SV=3
Bnascaffold13G0000200NO		0	0	3.82667	6.17691	0.00118236	Up	6.52696	0.000938659	Up	40S ribosomal protein S7-like [Brassica oleracea var. oleracea]	GO:0005622;GO:0005840;GO:0003735;GO:0009507;GO:0005829;GO:0006412;GO:0016020;GO:0022626;GO:0022627	intracellular;ribosome;structural constituent of ribosome;chloroplast;cytosol;translation;membrane;cytosolic ribosome;cytosolic small ribosomal subunit	K02993	RP-S7e,RPS7	http://www.genome.jp/dbget-bin/www_bget?ko:K02993	Ribosome	ko03010	KOG3320(J)(40S ribosomal protein S7)	40S	40S ribosomal protein S7 OS=Brassica oleracea GN=RPS7 PE=2 SV=1
novel.65569		0.323333	0.44	4.28333	3.08759	4.50598e-09	Up	2.94136	2.2309e-10	Up	[Brassica napus]	GO:0005739;GO:0006412;GO:0003735;GO:0005840;GO:0015935	mitochondrion;translation;structural constituent of ribosome;ribosome;small ribosomal subunit	K02992	RP-S7,MRPS7,rpsG	http://www.genome.jp/dbget-bin/www_bget?ko:K02992	Ribosome	ko03010	-	Ribosomal;Uncharacterized	Ribosomal protein S7, mitochondrial OS=Arabidopsis thaliana GN=RPS7 PE=2 SV=1;Uncharacterized mitochondrial protein AtMg00030 OS=Arabidopsis thaliana GN=AtMg00030 PE=4 SV=1
BnaC08G0404900NO		4.34	12.23	54.75	3.11294	1.28e-07	Up	1.82341	0.00024444	Up	[Brassica napus];protein product [Brassica oleracea]	-	-	K02983	RP-S30e,RPS30	http://www.genome.jp/dbget-bin/www_bget?ko:K02983	Ribosome	ko03010	KOG0009(JO)(Ubiquitin-like/40S ribosomal S30 protein fusion)	40S	40S ribosomal protein S30 OS=Arabidopsis thaliana GN=RPS30A PE=3 SV=3
BnaC07G0011100NO		2.51333	2.93667	10.9267	1.48731	0.00116993	Up	1.53774	0.00105493	Up	protein product [Brassica oleracea]	GO:0003723;GO:0003735;GO:0005739;GO:0022626;GO:0015934;GO:0006412;GO:0005840	RNA binding;structural constituent of ribosome;mitochondrion;cytosolic ribosome;large ribosomal subunit;translation;ribosome	K02926	RP-L4,MRPL4,rplD	http://www.genome.jp/dbget-bin/www_bget?ko:K02926	Ribosome	ko03010	KOG1624(J)(Mitochondrial/chloroplast ribosomal protein L4)	50S	50S ribosomal protein L4 OS=Rickettsia bellii (strain RML369-C) GN=rplD PE=3 SV=1
novel.29640		4.17667	1.37667	21.4067	1.70653	0.000948806	Up	3.57713	2.16989e-14	Up	protein product [Brassica oleracea]	GO:0005739;GO:0006412;GO:0003735;GO:0003723;GO:0005840	mitochondrion;translation;structural constituent of ribosome;RNA binding;ribosome	K02982	RP-S3,rpsC	http://www.genome.jp/dbget-bin/www_bget?ko:K02982	Ribosome	ko03010	KOG3422(J)(Mitochondrial ribosomal protein L16)	Ribosomal	Ribosomal protein S3, mitochondrial OS=Brassica napus GN=RPS3 PE=3 SV=1
BnaC05G0546900NO		0	0	3.82667	6.17691	0.00118236	Up	6.52696	0.000938659	Up	40S ribosomal protein S7-like [Brassica oleracea var. oleracea]	GO:0022627;GO:0005622;GO:0009507;GO:0016020;GO:0005829;GO:0006412;GO:0005840;GO:0022626;GO:0003735	cytosolic small ribosomal subunit;intracellular;chloroplast;membrane;cytosol;translation;ribosome;cytosolic ribosome;structural constituent of ribosome	K02993	RP-S7e,RPS7	http://www.genome.jp/dbget-bin/www_bget?ko:K02993	Ribosome	ko03010	KOG3320(J)(40S ribosomal protein S7)	40S	40S ribosomal protein S7 OS=Brassica oleracea GN=RPS7 PE=2 SV=1
BnaA01G0230600NO		6.27667	7.47667	32.44	1.63917	1e-06	Up	1.8268	0.00635317	Up	60S ribosomal protein L3-2 [Brassica rapa] &gt;[Brassica napus];protein BRARA_A02545 [Brassica rapa];VDC76664.1 unnamed protein product [Brassica rapa]	-	-	K02925	RP-L3e,RPL3	http://www.genome.jp/dbget-bin/www_bget?ko:K02925	Ribosome	ko03010	KOG0746(J)(60S ribosomal protein L3 and related proteins)	60S;60S	60S ribosomal protein L3-2 OS=Arabidopsis thaliana GN=ARP2 PE=2 SV=4;60S ribosomal protein L3-1 OS=Arabidopsis thaliana GN=ARP1 PE=1 SV=5
BnaA03G0500100NO		0.32	0.506667	5.01333	3.3333	0.00160385	Up	2.91292	0.006612	Up	ribosomal protein L28-2 [Brassica napus] &gt;CDY30215.1 BnaA03g49550D [Brassica napus]	GO:0003735;GO:0005840;GO:0006412;GO:0005622	structural constituent of ribosome;ribosome;translation;intracellular	K02903	RP-L28e,RPL28	http://www.genome.jp/dbget-bin/www_bget?ko:K02903	Ribosome	ko03010	KOG3412(J)(60S ribosomal protein L28)	60S	60S ribosomal protein L28-2 OS=Arabidopsis thaliana GN=RPL28C PE=2 SV=1
BnaA05G0322300NO		32.94	41.7767	112.937	1.1456	0.000513076	Up	1.05694	0.00426392	Up	protein product [Brassica rapa];protein product [Brassica oleracea];ribosomal protein L18a-2 [Brassica napus]	GO:0016021;GO:0016020;GO:0006412;GO:0005840;GO:0003735;GO:0030529	integral component of membrane;membrane;translation;ribosome;structural constituent of ribosome;intracellular ribonucleoprotein complex	K02882	RP-L18Ae,RPL18A	http://www.genome.jp/dbget-bin/www_bget?ko:K02882	Ribosome	ko03010	KOG0829(J)(60S ribosomal protein L18A)	60S;60S	60S ribosomal protein L18a-2 OS=Arabidopsis thaliana GN=RPL18AB PE=1 SV=2;60S ribosomal protein L18a-like protein OS=Arabidopsis thaliana GN=At1g29970 PE=2 SV=2
BnaC04G0274300NO		25.7433	44.16	124.843	1.53688	9.15e-07	Up	1.1413	0.00499409	Up	60S ribosomal protein L38-like [Brassica rapa];protein product [Brassica oleracea]	GO:0022625;GO:0005622;GO:0042254;GO:0022618;GO:0005840;GO:0006412;GO:0005737;GO:0022626;GO:0003735;GO:0003723;GO:0030529	cytosolic large ribosomal subunit;intracellular;ribosome biogenesis;ribonucleoprotein complex assembly;ribosome;translation;cytoplasm;cytosolic ribosome;structural constituent of ribosome;RNA binding;intracellular ribonucleoprotein complex	K02923	RP-L38e,RPL38	http://www.genome.jp/dbget-bin/www_bget?ko:K02923	Ribosome	ko03010	KOG3499(J)(60S ribosomal protein L38)	60S	60S ribosomal protein L38 OS=Arabidopsis thaliana GN=RPL38A PE=3 SV=1
BnaA04G0232700NO		10.5967	9.83	45.3667	1.6381	0.00334118	Up	1.76538	0.00112436	Up	[Brassica napus]	-	-	K02978	RP-S27e,RPS27	http://www.genome.jp/dbget-bin/www_bget?ko:K02978	Ribosome	ko03010	KOG1779(J)(40s ribosomal protein S27)	40S	40S ribosomal protein S27-2 OS=Arabidopsis thaliana GN=RPS27B PE=2 SV=2
novel.21386		59.9967	76.2033	232.393	1.33554	0.00464404	Up	1.24134	0.000571409	Up	protein BRARA_H02216 [Brassica rapa] &gt;VDD06849.1 unnamed protein product [Brassica rapa]	GO:0003735;GO:0005622;GO:0005840;GO:0015934;GO:0030529;GO:0006412	structural constituent of ribosome;intracellular;ribosome;large ribosomal subunit;intracellular ribonucleoprotein complex;translation	K02900	RP-L27Ae,RPL27A	http://www.genome.jp/dbget-bin/www_bget?ko:K02900	Ribosome	ko03010	KOG1742(J)(60s ribosomal protein L15/L27)	60S	60S ribosomal protein L27a-2 OS=Arabidopsis thaliana GN=RPL27AB PE=2 SV=1
BnaA02G0129300NO		8.44667	7.68667	39.1367	1.59385	0.00127345	Up	2.02192	0.000113101	Up	[Brassica napus]	GO:0015934;GO:0003735;GO:0006412	large ribosomal subunit;structural constituent of ribosome;translation	K02907	RP-L30,MRPL30,rpmD	http://www.genome.jp/dbget-bin/www_bget?ko:K02907	Ribosome	ko03010	-	50S	50S ribosomal protein L30 OS=Desulfobacterium autotrophicum (strain ATCC 43914 / DSM 3382 / HRM2) GN=rpmD PE=3 SV=1
BnaA01G0132300NO		43.15	72.25	215.807	1.71026	0.000203817	Up	1.23503	0.00185163	Up	protein product [Brassica oleracea]	GO:0005622;GO:0006412;GO:0005840;GO:0003735	intracellular;translation;ribosome;structural constituent of ribosome	K02875	RP-L14e,RPL14	http://www.genome.jp/dbget-bin/www_bget?ko:K02875	Ribosome	ko03010	KOG3421(J)(60S ribosomal protein L14)	60S	60S ribosomal protein L14-2 OS=Arabidopsis thaliana GN=RPL14B PE=1 SV=1
BnaC07G0022500NO		3.43333	4.9	26.78	2.34585	4.19e-05	Up	2.09284	0.000115434	Up	protein product [Brassica oleracea]	GO:0042254;GO:0005794;GO:0042273;GO:0006412;GO:0005840;GO:0005773;GO:0022625;GO:0005622;GO:0005783;GO:0003735;GO:0030529;GO:0005737;GO:0009506	ribosome biogenesis;Golgi apparatus;ribosomal large subunit biogenesis;translation;ribosome;vacuole;cytosolic large ribosomal subunit;intracellular;endoplasmic reticulum;structural constituent of ribosome;intracellular ribonucleoprotein complex;cytoplasm;plasmodesma	K02875	RP-L14e,RPL14	http://www.genome.jp/dbget-bin/www_bget?ko:K02875	Ribosome	ko03010	KOG3421(J)(60S ribosomal protein L14)	60S	60S ribosomal protein L14-1 OS=Arabidopsis thaliana GN=RPL14A PE=2 SV=1
BnaA08G0150600NO		3.46667	2.89667	15.3667	1.50621	0.00301149	Up	2.06925	0.00027203	Up	protein LOC106361274 [Brassica napus]	GO:0005840;GO:0006412;GO:0008097;GO:0003735	ribosome;translation;5S rRNA binding;structural constituent of ribosome	K02897	RP-L25,rplY	http://www.genome.jp/dbget-bin/www_bget?ko:K02897	Ribosome	ko03010	-	50S	50S ribosomal protein L25 OS=Bradyrhizobium diazoefficiens (strain JCM 10833 / IAM 13628 / NBRC 14792 / USDA 110) GN=rplY PE=3 SV=1
BnaC05G0417900NO		3.20667	4.73	18.07	1.87607	0.000149988	Up	1.59256	0.00235678	Up	[Brassica napus]	GO:0006412;GO:0005840;GO:0005622;GO:0003735;GO:0030529	translation;ribosome;intracellular;structural constituent of ribosome;intracellular ribonucleoprotein complex	K02906	RP-L3,MRPL3,rplC	http://www.genome.jp/dbget-bin/www_bget?ko:K02906	Ribosome	ko03010	KOG3141(J)(Mitochondrial/chloroplast ribosomal protein L3)	50S	50S ribosomal protein L3-2, chloroplastic OS=Arabidopsis thaliana GN=RPL3B PE=2 SV=1
novel.55668		2.41	1.91667	30.4067	3.15675	0.00563009	Up	3.6708	0.00149183	Up	protein product [Brassica oleracea]	-	-	K02961	RP-S17,MRPS17,rpsQ	http://www.genome.jp/dbget-bin/www_bget?ko:K02961	Ribosome	ko03010	-	-	-
novel.55665		2.41	1.91667	30.4067	3.15675	0.00563009	Up	3.6708	0.00149183	Up	protein product [Brassica oleracea]	-	-	K02961	RP-S17,MRPS17,rpsQ	http://www.genome.jp/dbget-bin/www_bget?ko:K02961	Ribosome	ko03010	-	-	-
BnaC02G0113700NO		2.88333	2.45	13.82	1.66597	0.00460446	Up	2.14046	0.00102359	Up	50S ribosomal protein L30 [Brassica oleracea var. oleracea] &gt;VDD21459.1 unnamed protein product [Brassica oleracea]	GO:0015934;GO:0003735;GO:0006412	large ribosomal subunit;structural constituent of ribosome;translation	K02907	RP-L30,MRPL30,rpmD	http://www.genome.jp/dbget-bin/www_bget?ko:K02907	Ribosome	ko03010	-	50S	50S ribosomal protein L30 OS=Desulfobacterium autotrophicum (strain ATCC 43914 / DSM 3382 / HRM2) GN=rpmD PE=3 SV=1
BnaA03G0089600NO		25.8667	12.6067	107.25	1.43682	0.00238254	Up	2.68552	6.81e-06	Up	protein product [Brassica rapa]	GO:0005622;GO:0005840;GO:0006412;GO:0003735;GO:0030529	intracellular;ribosome;translation;structural constituent of ribosome;intracellular ribonucleoprotein complex	K02919	RP-L36,MRPL36,rpmJ	http://www.genome.jp/dbget-bin/www_bget?ko:K02919	Ribosome	ko03010	KOG4122(J)(Mitochondrial/chloroplast ribosomal protein L36)	50S	50S ribosomal protein L36 OS=Lactobacillus reuteri (strain DSM 20016) GN=rpmJ PE=3 SV=1
BnaA05G0340800NO		4.45333	11.51	32.1	2.23169	2.84e-09	Up	1.13825	0.000937274	Up	ribosomal protein L10, chloroplastic [Brassica napus] &gt;CDY08435.1 BnaA05g26710D [Brassica napus]	GO:0030529;GO:0005622;GO:0042254;GO:0005840	intracellular ribonucleoprotein complex;intracellular;ribosome biogenesis;ribosome	K02864	RP-L10,MRPL10,rplJ	http://www.genome.jp/dbget-bin/www_bget?ko:K02864	Ribosome	ko03010	-	50S	50S ribosomal protein L10, chloroplastic OS=Arabidopsis thaliana GN=RPL10 PE=2 SV=1
Bnascaffold2463G0007900NO		226.45	286.6	146.02	-1.22579	0.000937257	Down	-1.26337	0.00788682	Down	XP_013676674.1 30S ribosomal protein S13, chloroplastic-like [Brassica napus] &gt;XP_013727788.1 30S ribosomal protein S13, chloroplastic-like [Brassica napus] &gt;ribosomal protein S13, chloroplastic-like [Brassica napus] &gt;XP_013676679.1 30S ribosomal protein S13, chloroplastic-like [Brassica napus]	GO:0015935;GO:0009536;GO:0009570;GO:0005829;GO:0009507;GO:0003723;GO:0003735;GO:0005840;GO:0009941;GO:0005622;GO:0003676;GO:0019843;GO:0030529;GO:0042254;GO:0006412	small ribosomal subunit;plastid;chloroplast stroma;cytosol;chloroplast;RNA binding;structural constituent of ribosome;ribosome;chloroplast envelope;intracellular;nucleic acid binding;rRNA binding;intracellular ribonucleoprotein complex;ribosome biogenesis;translation	K02952	RP-S13,rpsM	http://www.genome.jp/dbget-bin/www_bget?ko:K02952	Ribosome	ko03010	KOG3311(J)(Ribosomal protein S18)	30S	30S ribosomal protein S13, chloroplastic OS=Arabidopsis thaliana GN=RPS13 PE=2 SV=1
novel.52743		175.53	9.46333	0.253333	-10.1344	6.16613e-21	Down	-5.76404	0.00936139	Down	protein S7 (chloroplast) [Bixa orellana] &gt;QBK83765.1 ribosomal protein S7 (chloroplast) [Bixa orellana]	GO:0030529;GO:0006412;GO:0019843;GO:0003735;GO:0003723;GO:0005840;GO:0015935;GO:0009536;GO:0009507	intracellular ribonucleoprotein complex;translation;rRNA binding;structural constituent of ribosome;RNA binding;ribosome;small ribosomal subunit;plastid;chloroplast	K02992	RP-S7,MRPS7,rpsG	http://www.genome.jp/dbget-bin/www_bget?ko:K02992	Ribosome	ko03010	KOG3291(J)(Ribosomal protein S7)	30S	30S ribosomal protein S7, chloroplastic OS=Capsella bursa-pastoris GN=rps7-A PE=3 SV=1
BnaA06G0279500NO		2.45333	1.23	0.0466667	-6.68033	7.24e-10	Down	-5.34822	0.00369151	Down	XP_013721029.1 uncharacterized protein LOC106424824 [Brassica napus];protein LOC106424824 [Brassica napus] &gt	-	-	K02890	RP-L22,MRPL22,rplV	http://www.genome.jp/dbget-bin/www_bget?ko:K02890	Ribosome	ko03010	-	Glutathione	Glutathione S-transferase U9 OS=Arabidopsis thaliana GN=GSTU9 PE=2 SV=1
BnaC07G0293000NO		164.457	201.64	97.84	-1.36654	0.00121274	Down	-1.43642	0.00549638	Down	[Brassica napus]	GO:0006412;GO:0005840;GO:0005622;GO:0003735	translation;ribosome;intracellular;structural constituent of ribosome	K02935	RP-L7,MRPL12,rplL	http://www.genome.jp/dbget-bin/www_bget?ko:K02935	Ribosome	ko03010	-	50S	50S ribosomal protein L12-1, chloroplastic OS=Arabidopsis thaliana GN=RPL12A PE=2 SV=1
BnaC05G0153900NO	PPR protein	4.72667	3.52333	16.1033	1.11307	0.000863828	Up	1.85387	4.2e-07	Up	protein product, partial [Brassica oleracea]	-	-	-	-	-	-	-	-	Pentatricopeptide	Pentatricopeptide repeat-containing protein At1g18900 OS=Arabidopsis thaliana GN=At1g18900 PE=2 SV=1
BnaC05G0015500NO		0.17	0.216667	1.20333	2.2448	0.00729536	Up	2.11475	0.00823249	Up	pentatricopeptide repeat-containing protein At1g03100, mitochondrial [Brassica oleracea var. oleracea] &gt;VDD41403.1 unnamed protein product [Brassica oleracea]	-	-	-	-	-	-	-	-	Pentatricopeptide	Pentatricopeptide repeat-containing protein At1g03100, mitochondrial OS=Arabidopsis thaliana GN=At1g03100 PE=2 SV=1
BnaA09G0596900NO		0.93	2.21	8.1	2.49897	3.67e-06	Up	1.5075	0.00172781	Up	pentatricopeptide repeat-containing protein At1g08610 isoform X1 [Brassica rapa]	-	-	-	-	-	-	-	-	Pentatricopeptide	Pentatricopeptide repeat-containing protein At1g08610 OS=Arabidopsis thaliana GN=At1g08610 PE=2 SV=1
Bnascaffold2891G0007600NO		1.05667	0.703333	6.21667	1.92478	0.0041424	Up	2.87148	0.000363038	Up	protein BRARA_J00100 [Brassica rapa]	-	-	-	-	-	-	-	-	Pentatricopeptide	Pentatricopeptide repeat-containing protein At1g02370, mitochondrial OS=Arabidopsis thaliana GN=At1g02370 PE=2 SV=1
BnaA09G0053200NO		0.0633333	0.236667	3.01667	4.99597	3.61e-05	Up	3.33665	0.000314035	Up	pentatricopeptide repeat-containing protein At2g18520, mitochondrial [Brassica rapa]	GO:0016020	membrane	-	-	-	-	-	-	Pentatricopeptide	Pentatricopeptide repeat-containing protein At2g18520, mitochondrial OS=Arabidopsis thaliana GN=At2g18520 PE=2 SV=1
BnaA08G0180000NO		0.206667	0.166667	2.04667	2.62051	0.000979848	Up	3.18856	0.00184206	Up	protein product [Brassica rapa]	-	-	-	-	-	-	-	-	Pentatricopeptide	Pentatricopeptide repeat-containing protein At1g28690, mitochondrial OS=Arabidopsis thaliana GN=PCMP-E34 PE=2 SV=2
BnaA08G0220300NO		0.12	0.27	1.18	2.64395	0.000119969	Up	1.7828	0.00483685	Up	protein product [Brassica rapa]	-	-	K17964	LRPPRC	http://www.genome.jp/dbget-bin/www_bget?ko:K17964	-	-	-	Putative	Putative pentatricopeptide repeat-containing protein At1g19290 OS=Arabidopsis thaliana GN=At1g19290 PE=3 SV=2
BnaA05G0314400NO		0.0133333	0.0866667	1.53	6.14793	0.000151203	Up	3.75286	0.00199336	Up	repeat-containing protein At3g15590, mitochondrial-like [Brassica napus]	-	-	-	-	-	-	-	-	Pentatricopeptide	Pentatricopeptide repeat-containing protein At3g15590, mitochondrial OS=Arabidopsis thaliana GN=At3g15590 PE=2 SV=1
BnaC05G0120900NO		1.25	1.61333	6.18333	1.6556	0.00259372	Up	1.58092	0.0064441	Up	protein product [Brassica oleracea]	-	-	-	-	-	-	-	-	Pentatricopeptide	Pentatricopeptide repeat-containing protein At1g15480, mitochondrial OS=Arabidopsis thaliana GN=At1g15480 PE=2 SV=2
BnaA01G0309500NO		0.386667	0.92	5.79333	3.34364	0.00428589	Up	2.31583	6.38e-05	Up	CDY43368.1 BnaA01g29990D [Brassica napus];repeat-containing protein At3g13150 [Brassica napus] &gt	-	-	-	-	-	-	-	-	Pentatricopeptide	Pentatricopeptide repeat-containing protein At3g13150 OS=Arabidopsis thaliana GN=At3g13150 PE=2 SV=1
BnaC05G0010600NO		1.37	1.74667	8.16333	1.94094	2e-05	Up	1.8528	0.00189252	Up	pentatricopeptide repeat-containing protein At1g02370, mitochondrial [Brassica oleracea var. oleracea]	-	-	-	-	-	-	-	-	Pentatricopeptide	Pentatricopeptide repeat-containing protein At1g02370, mitochondrial OS=Arabidopsis thaliana GN=At1g02370 PE=2 SV=1
BnaC03G0102300NO		13.01	10.7033	46.02	1.19239	0.00681253	Up	1.77418	1.79e-06	Up	[Brassica napus]	-	-	-	-	-	-	-	-	Pentatricopeptide	Pentatricopeptide repeat-containing protein At2g31400, chloroplastic OS=Arabidopsis thaliana GN=At2g31400 PE=2 SV=1
BnaC05G0074300NO		0.376667	0.506667	2.40333	2.04925	0.00035323	Up	1.90945	0.000595659	Up	protein product [Brassica oleracea]	-	-	-	-	-	-	-	-	Pentatricopeptide	Pentatricopeptide repeat-containing protein At1g10270 OS=Arabidopsis thaliana GN=GRP23 PE=1 SV=1
BnaC05G0100500NO		0.3	0.386667	2.34	2.38469	3.87e-05	Up	2.23445	0.000558462	Up	protein DY000_00005398 [Brassica cretica]	-	-	-	-	-	-	-	-	Pentatricopeptide	Pentatricopeptide repeat-containing protein At4g28010 OS=Arabidopsis thaliana GN=At4g28010 PE=2 SV=1
BnaA07G0220000NO		1.54667	2.53667	10.5067	2.11934	9.48e-07	Up	1.71278	0.00010111	Up	[Brassica napus]	GO:0004519;GO:0005739;GO:0003677;GO:0003723;GO:0009941;GO:0009451	endonuclease activity;mitochondrion;DNA binding;RNA binding;chloroplast envelope;RNA modification	-	-	-	-	-	-	Pentatricopeptide	Pentatricopeptide repeat-containing protein At1g80270, mitochondrial OS=Arabidopsis thaliana GN=At1g80270 PE=2 SV=1
BnaA02G0303300NO		1.64	2.59333	17.45	3.08462	3.97e-09	Up	2.3767	7.52e-06	Up	[Brassica napus]	-	-	-	-	-	-	-	-	Putative	Putative pentatricopeptide repeat-containing protein At5g47460 OS=Arabidopsis thaliana GN=PCMP-E103 PE=3 SV=1
BnaC09G0088700NO		0.603333	0.943333	5.16667	2.41436	0.000447207	Up	2.12594	0.00498213	Up	pentatricopeptide repeat-containing protein At2g18520, mitochondrial [Brassica oleracea var. oleracea]	GO:0016020	membrane	-	-	-	-	-	-	Pentatricopeptide	Pentatricopeptide repeat-containing protein At2g18520, mitochondrial OS=Arabidopsis thaliana GN=At2g18520 PE=2 SV=1
BnaA01G0154300NO		0.16	0.15	1.29	2.33407	0.00533783	Up	2.76231	0.00197309	Up	protein BRARA_A01898 [Brassica rapa]	-	-	-	-	-	-	-	-	Pentatricopeptide	Pentatricopeptide repeat-containing protein At4g16470 OS=Arabidopsis thaliana GN=PCMP-E12 PE=2 SV=2
BnaA06G0129300NO		4.50333	2.83333	17.6167	1.32349	7.74e-05	Up	2.29115	1.41e-10	Up	pentatricopeptide repeat-containing protein At1g18900-like [Brassica rapa] &gt;RID58008.1 hypothetical protein BRARA_F01337 [Brassica rapa]	-	-	-	-	-	-	-	-	Pentatricopeptide	Pentatricopeptide repeat-containing protein At1g18900 OS=Arabidopsis thaliana GN=At1g18900 PE=2 SV=1
BnaA06G0422600NO		0.0766667	0.19	1.56	3.89293	8.72e-05	Up	2.74568	5.38e-05	Up	protein BRARA_F03619 [Brassica rapa]	-	-	-	-	-	-	-	-	Pentatricopeptide	Pentatricopeptide repeat-containing protein At5g46460, mitochondrial OS=Arabidopsis thaliana GN=PCMP-H49 PE=2 SV=1
BnaA03G0280000NO		0.306667	0.313333	2.69333	2.51456	0.00112018	Up	2.78705	0.00100825	Up	protein product [Brassica rapa]	-	-	-	-	-	-	-	-	Putative	Putative pentatricopeptide repeat-containing protein At3g01580 OS=Arabidopsis thaliana GN=PCMP-E87 PE=3 SV=2
BnaA09G0033700NO		0.82	1.31667	5.91	2.33152	3.15e-06	Up	1.88408	0.000986085	Up	protein product [Brassica rapa]	GO:0008270	zinc ion binding	-	-	-	-	-	-	Pentatricopeptide	Pentatricopeptide repeat-containing protein At3g26782, mitochondrial OS=Arabidopsis thaliana GN=PCMP-H34 PE=2 SV=1
novel.22828		1.71	3.48667	9.54333	1.8525	0.00767661	Up	1.08091	0.00820772	Up	protein BRARA_I01548 [Brassica rapa] &gt;VDC59747.1 unnamed protein product [Brassica rapa]	-	-	-	-	-	-	-	-	Pentatricopeptide	Pentatricopeptide repeat-containing protein At1g60770 OS=Arabidopsis thaliana GN=At1g60770 PE=2 SV=1
BnaC05G0527400NO		13.84	12.63	8.12	-1.3429	0.000119539	Down	-1.10956	0.00697809	Down	repeat-containing protein At3g04760, chloroplastic [Brassica napus] &gt;protein DY000_00009661, partial [Brassica cretica];CDY41899.1 BnaC05g47050D [Brassica napus]	GO:0005739;GO:0009536;GO:0008150;GO:0009507	mitochondrion;plastid;biological_process;chloroplast	-	-	-	-	-	-	Pentatricopeptide	Pentatricopeptide repeat-containing protein At3g04760, chloroplastic OS=Arabidopsis thaliana GN=At3g04760 PE=2 SV=1
BnaC07G0208600NO		53.3367	34.7667	19.0367	-2.1686	2.72e-09	Down	-1.23388	0.00199119	Down	putative glucose-6-phosphate 1-epimerase isoform X3 [Brassica oleracea var. oleracea];[Brassica napus];putative glucose-6-phosphate 1-epimerase isoform X1 [Brassica oleracea var. oleracea]	-	-	K01792	E5.1.3.15	http://www.genome.jp/dbget-bin/www_bget?ko:K01792	Glycolysis / Gluconeogenesis	ko00010	-	Pentatricopeptide	Pentatricopeptide repeat-containing protein At5g66520 OS=Arabidopsis thaliana GN=PCMP-H61 PE=2 SV=1
BnaC08G0027900NO		6.94	8.65	4.43667	-1.30312	0.00295054	Down	-1.34415	0.00599054	Down	pentatricopeptide repeat-containing protein DWY1, chloroplastic isoform X1 [Brassica rapa]	GO:0009507;GO:0046872;GO:0005515;GO:0006397;GO:1900871;GO:1900865;GO:0017118;GO:0009536;GO:0006464;GO:0008270	chloroplast;metal ion binding;protein binding;mRNA processing;chloroplast mRNA modification;chloroplast RNA modification;lipoyltransferase activity;plastid;cellular protein modification process;zinc ion binding	-	-	-	-	-	-	Pentatricopeptide	Pentatricopeptide repeat-containing protein DWY1, chloroplastic OS=Arabidopsis thaliana GN=DYW1 PE=1 SV=1
BnaA08G0016300NO		2.76	9.71	0.6	-2.90242	0.000441584	Down	-4.21566	2.15e-13	Down	XP_022545501.1 pentatricopeptide repeat-containing protein DWY1, chloroplastic-like [Brassica napus];repeat-containing protein DWY1, chloroplastic-like [Brassica napus] &gt;pentatricopeptide repeat-containing protein DWY1, chloroplastic isoform X1 [Brassica rapa]	GO:0008270;GO:0017118;GO:0006464;GO:0009536;GO:0006397;GO:1900871;GO:1900865;GO:0005515;GO:0009507;GO:0046872	zinc ion binding;lipoyltransferase activity;cellular protein modification process;plastid;mRNA processing;chloroplast mRNA modification;chloroplast RNA modification;protein binding;chloroplast;metal ion binding	-	-	-	-	-	-	Pentatricopeptide	Pentatricopeptide repeat-containing protein DWY1, chloroplastic OS=Arabidopsis thaliana GN=DYW1 PE=1 SV=1
BnaC04G0338800NO	rpoA	25.99	44.0867	342.47	4.77148	1.18e-26	Up	2.63651	8.57e-06	Up	gene product (chloroplast) [Brassica napus] &gt;YP_009177897.1 RNA polymerase alpha subunit (chloroplast) [Brassica juncea] &gt;ASY93393.1 RpoA (chloroplast) [Brassica rapa] &gt;AKD00121.1 RNA polymerase alpha subunit (plastid) [Brassica napus] &gt;ASY95220.1 RpoA (chloroplast) [Brassica napus var. napus] &gt;ASY95133.1 RpoA (chloroplast) [Brassica napus var. napus] &gt;ANW83310.1 RpoA (plastid) …	GO:0009507;GO:0006351;GO:0046983;GO:0016740;GO:0009536;GO:0003677;GO:0003899;GO:0016779	chloroplast;transcription, DNA-templated;protein dimerization activity;transferase activity;plastid;DNA binding;DNA-directed 5'-3' RNA polymerase activity;nucleotidyltransferase activity	K03040	rpoA	http://www.genome.jp/dbget-bin/www_bget?ko:K03040	RNA polymerase;Purine metabolism;Pyrimidine metabolism	ko03020,ko00230,ko00240	-	DNA-directed;DNA-directed	DNA-directed RNA polymerase subunit alpha OS=Nasturtium officinale GN=rpoA PE=3 SV=1;DNA-directed RNA polymerase subunit alpha OS=Arabis hirsuta GN=rpoA PE=3 SV=1
BnaC02G0358400NO		0	27.9033	233.157	13.2871	8.66e-23	Up	2.66156	1.73e-05	Up	CDY28599.1 BnaA06g19390D [Brassica napus] &gt;QAY81376.1 RNA polymerase alpha subunit (chloroplast) [Brassica rapa] &gt;ANW83481.1 RpoA (plastid) [Brassica napus var. napus] &gt;ACY66281.1 RNA polymerase alpha subunit (chloroplast) [Brassica napus] &gt;ASY93393.1 RpoA (chloroplast) [Brassica rapa] &gt;AKD00121.1 RNA polymerase alpha subunit (plastid) [Brassica napus] &gt;ASY95220.1 RpoA (chloropl…	GO:0016779;GO:0003899;GO:0003677;GO:0009536;GO:0046983;GO:0006351;GO:0016740;GO:0009507	nucleotidyltransferase activity;DNA-directed 5'-3' RNA polymerase activity;DNA binding;plastid;protein dimerization activity;transcription, DNA-templated;transferase activity;chloroplast	K03040	rpoA	http://www.genome.jp/dbget-bin/www_bget?ko:K03040	RNA polymerase;Purine metabolism;Pyrimidine metabolism	ko03020,ko00230,ko00240	-	DNA-directed	DNA-directed RNA polymerase subunit alpha OS=Nasturtium officinale GN=rpoA PE=3 SV=1

## Sheet: Table S8
Table S8 Putative DEGs related to carotenoid biosynthesis
gene ID	class	FPKM			log2FC(WL/GL)	padj(WL/GL)	up/down(WL/GL)	log2FC(WL/WGL)	padj(WL/WGL)	up/down(WL/WGL)	NR_def	GO_ID	GO_term	KO_ID	KO_gene	Hyperlink	KEGG Pathway	Pathway ID	Kog_Annotation	Swiss-Prot_Id	Swiss-Prot_Annotation
		GL	WGL	WL
BnaC02G0031000NO	carotenoid biosynthesis	40.7867	7.79667	2.45	-5.02496	1.12723e-30	down	-2.01233	0.00198964	down	synthase, partial [Brassica oleracea];phytoene synthase, chloroplastic-like [Brassica oleracea var. oleracea]	GO:0016740;GO:0009058;GO:0016765	transferase activity;biosynthetic process;transferase activity, transferring alkyl or aryl (other than methyl) groups	K02291	crtB	http://www.genome.jp/dbget-bin/www_bget?ko:K02291	Carotenoid biosynthesis	ko00906	-	Phytoene	Phytoene synthase, chloroplastic OS=Arabidopsis thaliana GN=PSY1 PE=1 SV=2
BnaA06G0049500NO		27.85	42.85	17.79	-1.29666	0.000109069	down	-1.64596	0.000198397	down	violaxanthin de-epoxidase, chloroplastic [Brassica rapa]	GO:0055114;GO:0046422;GO:0016491;GO:0009507	oxidation-reduction process;violaxanthin de-epoxidase activity;oxidoreductase activity;chloroplast	K09839	VDE,NPQ1	http://www.genome.jp/dbget-bin/www_bget?ko:K09839	Carotenoid biosynthesis	ko00906	-	Violaxanthin	Violaxanthin de-epoxidase, chloroplastic OS=Arabidopsis thaliana GN=VDE1 PE=1 SV=1
BnaC05G0058700NO		40.7867	64.1767	25.6867	-1.33262	1.58155e-05	down	-1.69002	8.19569e-08	down	de-epoxidase, chloroplastic-like [Brassica napus] &gt;AGL08132.1 chloroplast violaxanthin de-epoxidase [Brassica napus];protein product [Brassica oleracea]	GO:0016491;GO:0009507;GO:0055114;GO:0046422	oxidoreductase activity;chloroplast;oxidation-reduction process;violaxanthin de-epoxidase activity	K09839	VDE,NPQ1	http://www.genome.jp/dbget-bin/www_bget?ko:K09839	Carotenoid biosynthesis	ko00906	-	Violaxanthin	Violaxanthin de-epoxidase, chloroplastic OS=Arabidopsis thaliana GN=VDE1 PE=1 SV=1

## Sheet: Table S9
Table S9 DEGs in the candidate regions
gene ID	FPKM			log2FC(WL/GL)	padj(WL/GL)	up/down(WL/GL)	log2FC(WL/WGL)	padj(WL/WGL)	up/down(WL/WGL)	NR_def	GO_ID	GO_term	KO_ID	KO_gene	Hyperlink	KEGG Pathway	Pathway ID	Kog_Annotation	Swiss-Prot_Id	Swiss-Prot_Annotation
	GL	WGL	WL
BnaA03G0216500NO	0.393333	0.66	6.17333	3.39823	2.42e-05	Up	2.90669	0.00176882	Up	protein BRARA_C02279 [Brassica rapa]	GO:0005654;GO:0030687;GO:0006364;GO:0043021;GO:0042254;GO:0042273;GO:0005634;GO:0000466;GO:0005730;GO:0000463	nucleoplasm;preribosome, large subunit precursor;rRNA processing;ribonucleoprotein complex binding;ribosome biogenesis;ribosomal large subunit biogenesis;nucleus;maturation of 5.8S rRNA from tricistronic rRNA transcript (SSU-rRNA, 5.8S rRNA, LSU-rRNA);nucleolus;maturation of LSU-rRNA from tricistronic rRNA transcript (SSU-rRNA, 5.8S rRNA, LSU-rRNA)	K14824	ERB1,BOP1	http://www.genome.jp/dbget-bin/www_bget?ko:K14824	-	-	KOG0650(J)(WD40 repeat nucleolar protein Bop1, involved in ribosome biogenesis)	Ribosome	Ribosome biogenesis protein BOP1 homolog OS=Arabidopsis thaliana GN=BOP1 PE=1 SV=1
BnaA03G0217300NO	1.34333	4.43333	0.0333333	-5.78956	0.00192152	Down	-7.36284	0.000220386	Down	regulator YABBY 1 [Brassica napus]	GO:0007275	multicellular organism development	-	-	-	-	-	-	Axial	Axial regulator YABBY 1 OS=Arabidopsis thaliana GN=YAB1 PE=1 SV=1
BnaA03G0235300NO	0.16	0.0466667	2.39333	3.18627	0.00263418	Up	5.79659	0.000278247	Up	protein product [Brassica rapa]	GO:0010286;GO:0006355;GO:0003677;GO:0044212;GO:0034620;GO:0043565;GO:0005634;GO:0045893;GO:0001666;GO:0003700	heat acclimation;regulation of transcription, DNA-templated;DNA binding;transcription regulatory region DNA binding;cellular response to unfolded protein;sequence-specific DNA binding;nucleus;positive regulation of transcription, DNA-templated;response to hypoxia;transcription factor activity, sequence-specific DNA binding	K09419	HSFF	http://www.genome.jp/dbget-bin/www_bget?ko:K09419	-	-	-	Heat	Heat stress transcription factor A-2 OS=Arabidopsis thaliana GN=HSFA2 PE=1 SV=1
BnaA07G0066400NO	104.06	175.007	55.12	-1.59453	4.69e-08	Down	-2.04238	0.000273101	Down	esterase KAI2 isoform X2 [Brassica napus];protein BRARA_G00622 [Brassica rapa]	-	-	-	-	-	-	-	-	Probable	Probable esterase KAI2 OS=Arabidopsis thaliana GN=KAI2 PE=1 SV=1
BnaA07G0070800NO	8.63	12.0167	0.526667	-4.74026	1.66e-12	Down	-4.89121	3.42e-07	Down	protein product, partial [Brassica oleracea];probable pectate lyase 9 [Brassica rapa]	GO:0030570;GO:0045490;GO:0046872;GO:0016829	pectate lyase activity;pectin catabolic process;metal ion binding;lyase activity	K01728	pel	http://www.genome.jp/dbget-bin/www_bget?ko:K01728	Pentose and glucuronate interconversions	ko00040	-	Probable	Probable pectate lyase 9 OS=Arabidopsis thaliana GN=At3g24230 PE=2 SV=1
BnaA07G0073700NO	1.41	3.97667	17.5833	3.00471	3.23e-10	Up	1.79805	0.000131217	Up	protein product [Brassica rapa]	-	-	K14847	RPF2	http://www.genome.jp/dbget-bin/www_bget?ko:K14847	-	-	KOG3031(J)(Protein required for biogenesis of the ribosomal 60S subunit)	Ribosome	Ribosome production factor 2 homolog OS=Arabidopsis thaliana GN=At3g23620 PE=2 SV=1
BnaA07G0080000NO	37.7967	41.6333	26.08	-1.18408	0.000947715	Down	-1.03835	0.00752543	Down	kDa zinc-binding protein [Brassica napus]	GO:0009507;GO:0003824;GO:0005080;GO:0005739;GO:0008270	chloroplast;catalytic activity;protein kinase C binding;mitochondrion;zinc ion binding	-	-	-	-	-	KOG3275(T)(Zinc-binding protein of the histidine triad (HIT) family)	Adenylylsulfatase	Adenylylsulfatase HINT1 OS=Arabidopsis thaliana GN=HINT1 PE=1 SV=1
BnaA07G0085500NO	8855.94	15743.6	1672.39	-3.09145	0.000150674	Down	-3.65432	0.000211038	Down	protein product [Brassica oleracea];XP_013652989.1 chlorophyll a-b binding protein 1, chloroplastic-like [Brassica napus] &gt;a-b binding protein 1, chloroplastic-like [Brassica napus] &gt;CDY43198.1 BnaA07g07560D [Brassica napus]	GO:0018298;GO:0009579;GO:0015979;GO:0016168;GO:0009765;GO:0046872;GO:0009507;GO:0009535;GO:0009522;GO:0016020;GO:0016021	protein-chromophore linkage;thylakoid;photosynthesis;chlorophyll binding;photosynthesis, light harvesting;metal ion binding;chloroplast;chloroplast thylakoid membrane;photosystem I;membrane;integral component of membrane	K08912	LHCB1	http://www.genome.jp/dbget-bin/www_bget?ko:K08912	Photosynthesis - antenna proteins	ko00196	-	Chlorophyll;Chlorophyll	Chlorophyll a-b binding protein 3, chloroplastic OS=Arabidopsis thaliana GN=LHCB1.2 PE=1 SV=2;Chlorophyll a-b binding protein 1, chloroplastic OS=Sinapis alba GN=CAB1 PE=3 SV=1
BnaA07G0093800NO	0.573333	0.143333	13.26	3.99392	3.35e-08	Up	6.60915	6.41e-10	Up	domain-containing protein 10-like isoform X2 [Brassica napus];domain-containing protein 10-like isoform X1 [Brassica napus]	GO:0006351;GO:0005634;GO:0006355;GO:0003677	transcription, DNA-templated;nucleus;regulation of transcription, DNA-templated;DNA binding	-	-	-	-	-	-	NAC	NAC domain-containing protein 10 OS=Arabidopsis thaliana GN=NAC010 PE=2 SV=1
BnaA07G0099300NO	7.58667	10.2867	4.65667	-1.35706	0.000570537	Down	-1.52126	0.00175235	Down	protein product [Brassica rapa]	-	-	-	-	-	-	-	-	-	-
BnaA07G0105700NO	66.75	97.0733	22.45	-2.2423	2.91e-10	Down	-2.45266	7.79e-13	Down	protein BRARA_G00872 [Brassica rapa] &gt;VDC97469.1 unnamed protein product [Brassica rapa]	GO:0005622;GO:0008270	intracellular;zinc ion binding	-	-	-	-	-	-	Zinc	Zinc finger protein CONSTANS-LIKE 16 OS=Arabidopsis thaliana GN=COL16 PE=2 SV=2
BnaA08G0011900NO	9.29667	18.95	5.45667	-1.43468	0.00469132	Down	-2.17466	1.98e-05	Down	protein BRARA_H00364 [Brassica rapa]	GO:0016788;GO:0009507;GO:0047617;GO:0042372;GO:0005777;GO:0016787;GO:0051289	hydrolase activity, acting on ester bonds;chloroplast;acyl-CoA hydrolase activity;phylloquinone biosynthetic process;peroxisome;hydrolase activity;protein homotetramerization	-	-	-	-	-	-	1,4-dihydroxy-2-naphthoyl-CoA	1,4-dihydroxy-2-naphthoyl-CoA thioesterase 1 OS=Arabidopsis thaliana GN=DHNAT1 PE=1 SV=1
BnaA08G0016300NO	2.76	9.71	0.6	-2.90242	0.000441584	Down	-4.21566	2.15e-13	Down	XP_022545501.1 pentatricopeptide repeat-containing protein DWY1, chloroplastic-like [Brassica napus];repeat-containing protein DWY1, chloroplastic-like [Brassica napus] &gt;pentatricopeptide repeat-containing protein DWY1, chloroplastic isoform X1 [Brassica rapa]	GO:0008270;GO:0017118;GO:0006464;GO:0009536;GO:0006397;GO:1900871;GO:1900865;GO:0005515;GO:0009507;GO:0046872	zinc ion binding;lipoyltransferase activity;cellular protein modification process;plastid;mRNA processing;chloroplast mRNA modification;chloroplast RNA modification;protein binding;chloroplast;metal ion binding	-	-	-	-	-	-	Pentatricopeptide	Pentatricopeptide repeat-containing protein DWY1, chloroplastic OS=Arabidopsis thaliana GN=DYW1 PE=1 SV=1
BnaA08G0019300NO	23.09	41.7433	4.72	-3.02168	0.000782873	Down	-3.52095	0.000145593	Down	cysteine proteinase RD21A-like [Brassica rapa]	GO:0016787;GO:0008234;GO:0006508;GO:0008233	hydrolase activity;cysteine-type peptidase activity;proteolysis;peptidase activity	-	-	-	-	-	KOG1543(O)(Cysteine proteinase Cathepsin L)	Cysteine	Cysteine proteinase RD21A OS=Arabidopsis thaliana GN=RD21A PE=1 SV=1
BnaA08G0030000NO	2.40667	3.89	0.673333	-2.51612	0.00317905	Down	-2.90319	0.000285758	Down	protein product, partial [Brassica rapa]	-	-	K08059	IFI30,GILT	http://www.genome.jp/dbget-bin/www_bget?ko:K08059	-	-	-	Gamma-interferon-inducible-lysosomal	Gamma-interferon-inducible-lysosomal thiol reductase OS=Sus scrofa GN=IFI30 PE=2 SV=1
BnaA08G0030700NO	667.913	828.79	250.18	-2.07882	5.32e-07	Down	-2.1233	0.000522832	Down	protein product, partial [Brassica rapa]	GO:0016021;GO:0016020;GO:0009538;GO:0009522;GO:0015979	integral component of membrane;membrane;photosystem I reaction center;photosystem I;photosynthesis	K02699	psaL	http://www.genome.jp/dbget-bin/www_bget?ko:K02699	Photosynthesis	ko00195	-	Photosystem	Photosystem I reaction center subunit XI, chloroplastic OS=Arabidopsis thaliana GN=PSAL PE=1 SV=2
BnaA08G0046500NO	31.35	54.5133	13.2567	-1.89801	5.56e-10	Down	-2.41857	3.43e-09	Down	[Brassica napus]	GO:0006457;GO:0009507;GO:0000413;GO:0003755;GO:0031977;GO:0016853	protein folding;chloroplast;protein peptidyl-prolyl isomerization;peptidyl-prolyl cis-trans isomerase activity;thylakoid lumen;isomerase activity	K03768	PPIB,ppiB	http://www.genome.jp/dbget-bin/www_bget?ko:K03768	-	-	KOG0880(O)(Peptidyl-prolyl cis-trans isomerase)	Peptidyl-prolyl	Peptidyl-prolyl cis-trans isomerase CYP28, chloroplastic OS=Arabidopsis thaliana GN=CYP28 PE=1 SV=1
BnaA08G0048400NO	219.877	241.84	83.87	-2.07117	6.09e-11	Down	-1.88472	3.85e-05	Down	protein product [Brassica rapa]	GO:0009507;GO:0006807;GO:0003824;GO:0004356;GO:0006542;GO:0009536;GO:0000166;GO:0016874;GO:0005524	chloroplast;nitrogen compound metabolic process;catalytic activity;glutamate-ammonia ligase activity;glutamine biosynthetic process;plastid;nucleotide binding;ligase activity;ATP binding	K01915	glnA,GLUL	http://www.genome.jp/dbget-bin/www_bget?ko:K01915	Alanine, aspartate and glutamate metabolism;Arginine biosynthesis;Glyoxylate and dicarboxylate metabolism;Nitrogen metabolism;Biosynthesis of amino acids	ko00250,ko00220,ko00630,ko00910,ko01230	KOG0683(E)(Glutamine synthetase)	Glutamine	Glutamine synthetase, chloroplastic OS=Brassica napus GN=GLN2 PE=2 SV=1
BnaA08G0055800NO	113.357	220.65	57.1933	-1.64728	0.000242695	Down	-2.33586	3.7e-05	Down	protein BRARA_H00722 [Brassica rapa]	-	-	K02694	psaF	http://www.genome.jp/dbget-bin/www_bget?ko:K02694	Photosynthesis	ko00195	-	Photosystem	Photosystem I reaction center subunit III, chloroplastic OS=Arabidopsis thaliana GN=PSAF PE=1 SV=1
BnaA08G0056200NO	47.63	93.5933	23.25	-1.64545	5.96e-06	Down	-2.35571	7.73e-08	Down	XP_022552646.1 sulfiredoxin, chloroplastic/mitochondrial isoform X1 [Brassica napus];protein product, partial [Brassica rapa];[Brassica napus];chloroplastic/mitochondrial isoform X1 [Brassica napus] &gt	GO:0032542;GO:0006979;GO:0016667;GO:0055114;GO:0016491;GO:0016209;GO:0009507;GO:0034599;GO:0005739;GO:0003677;GO:0005524;GO:0000166	sulfiredoxin activity;response to oxidative stress;oxidoreductase activity, acting on a sulfur group of donors;oxidation-reduction process;oxidoreductase activity;antioxidant activity;chloroplast;cellular response to oxidative stress;mitochondrion;DNA binding;ATP binding;nucleotide binding	K12260	SRX1	http://www.genome.jp/dbget-bin/www_bget?ko:K12260	-	-	-	Sulfiredoxin,	Sulfiredoxin, chloroplastic/mitochondrial OS=Arabidopsis thaliana GN=SRX PE=1 SV=1
BnaC03G0506600NO	1.28667	2.34667	0.193333	-3.87057	0.00709782	Down	-4.43038	0.00219397	Down	VDC96716.1 unnamed protein product [Brassica oleracea];putative NAC domain-containing protein 61 [Brassica oleracea var. oleracea] &gt	GO:0003677;GO:0006355;GO:0005634;GO:0006351	DNA binding;regulation of transcription, DNA-templated;nucleus;transcription, DNA-templated	-	-	-	-	-	-	Putative	Putative NAC domain-containing protein 61 OS=Arabidopsis thaliana GN=NAC061 PE=2 SV=1
BnaC03G0522600NO	10.21	15.48	43.0067	1.4442	0.00397508	Up	1.11538	0.00356444	Up	protein TOC75-3, chloroplastic [Brassica oleracea var. oleracea]	GO:0045037;GO:0006886;GO:0009536;GO:0005774;GO:0045036;GO:0009735;GO:0016020;GO:0019867;GO:0031359;GO:0048598;GO:0015450;GO:0009658;GO:0009941;GO:0009507	protein import into chloroplast stroma;intracellular protein transport;plastid;vacuolar membrane;protein targeting to chloroplast;response to cytokinin;membrane;outer membrane;integral component of chloroplast outer membrane;embryonic morphogenesis;P-P-bond-hydrolysis-driven protein transmembrane transporter activity;chloroplast organization;chloroplast envelope;chloroplast	-	-	-	-	-	-	Protein	Protein TOC75-3, chloroplastic OS=Arabidopsis thaliana GN=TOC75-3 PE=1 SV=1
BnaC03G0529100NO	1554.98	1178.72	430.107	-2.52693	6.71e-06	Down	-1.82369	0.0081308	Down	CDY47410.1 BnaCnng15190D [Brassica napus];XP_013731611.1 chlorophyll a-b binding protein 4, chloroplastic [Brassica napus] &gt;a-b binding protein 4, chloroplastic [Brassica napus] &gt	GO:0080167;GO:0010287;GO:0009507;GO:0046872;GO:0009522;GO:0009535;GO:0009941;GO:0009644;GO:0016020;GO:0016021;GO:0018298;GO:0009536;GO:0015979;GO:0031409;GO:0009579;GO:0009645;GO:0009409;GO:0009534;GO:0016168;GO:0030076;GO:0009765;GO:0009768	response to karrikin;plastoglobule;chloroplast;metal ion binding;photosystem I;chloroplast thylakoid membrane;chloroplast envelope;response to high light intensity;membrane;integral component of membrane;protein-chromophore linkage;plastid;photosynthesis;pigment binding;thylakoid;response to low light intensity stimulus;response to cold;chloroplast thylakoid;chlorophyll binding;light-harvesting c…	K08910	LHCA4	http://www.genome.jp/dbget-bin/www_bget?ko:K08910	Photosynthesis - antenna proteins	ko00196	-	Chlorophyll	Chlorophyll a-b binding protein 4, chloroplastic OS=Arabidopsis thaliana GN=LHCA4 PE=1 SV=1
BnaC04G0372000NO	685.89	683.35	209.003	-2.37453	1.07e-12	Down	-2.09457	2.61e-05	Down	[Brassica napus]	GO:0009536;GO:0006542;GO:0000166;GO:0005524;GO:0016874;GO:0009507;GO:0003824;GO:0006807;GO:0004356	plastid;glutamine biosynthetic process;nucleotide binding;ATP binding;ligase activity;chloroplast;catalytic activity;nitrogen compound metabolic process;glutamate-ammonia ligase activity	K01915	glnA,GLUL	http://www.genome.jp/dbget-bin/www_bget?ko:K01915	Alanine, aspartate and glutamate metabolism;Arginine biosynthesis;Glyoxylate and dicarboxylate metabolism;Nitrogen metabolism;Biosynthesis of amino acids	ko00250,ko00220,ko00630,ko00910,ko01230	KOG0683(E)(Glutamine synthetase)	Glutamine	Glutamine synthetase, chloroplastic OS=Brassica napus GN=GLN2 PE=2 SV=1
BnaC04G0374400NO	1051.63	951.447	312.713	-2.41621	1.72e-11	Down	-2.00374	0.000521079	Down	I reaction center subunit XI, chloroplastic [Brassica napus] &gt;CDY70523.1 BnaC04g55930D [Brassica napus]	GO:0009535;GO:0009941;GO:0009522;GO:0010287;GO:0009507;GO:0005515;GO:0016021;GO:0016020;GO:0009538;GO:0009579;GO:0015979;GO:0009536;GO:0031969;GO:0019684;GO:0009534	chloroplast thylakoid membrane;chloroplast envelope;photosystem I;plastoglobule;chloroplast;protein binding;integral component of membrane;membrane;photosystem I reaction center;thylakoid;photosynthesis;plastid;chloroplast membrane;photosynthesis, light reaction;chloroplast thylakoid	K02699	psaL	http://www.genome.jp/dbget-bin/www_bget?ko:K02699	Photosynthesis	ko00195	-	Photosystem	Photosystem I reaction center subunit XI, chloroplastic OS=Arabidopsis thaliana GN=PSAL PE=1 SV=2
BnaC04G0374500NO	78.3967	54.42	26.0467	-2.25259	5.31e-09	Down	-1.41957	0.00178333	Down	[Brassica napus]	GO:0009507;GO:0003824;GO:0016787	chloroplast;catalytic activity;hydrolase activity	-	-	-	-	-	KOG4178(I)(Soluble epoxide hydrolase)	Haloalkane	Haloalkane dehalogenase 2 OS=Mycobacterium bovis (strain ATCC BAA-935 / AF2122/97) GN=dhmA2 PE=3 SV=1
BnaC04G0377700NO	27.07	50.6533	15.9267	-1.42405	0.00265841	Down	-2.02265	1.13e-05	Down	chlorophyll(ide) b reductase NYC1, chloroplastic [Brassica napus]	GO:0016020;GO:0016021	membrane;integral component of membrane	K13606	NOL,NYC1	http://www.genome.jp/dbget-bin/www_bget?ko:K13606	Porphyrin and chlorophyll metabolism	ko00860	KOG1205(Q)(Predicted dehydrogenase)	Probable	Probable chlorophyll(ide) b reductase NYC1, chloroplastic OS=Arabidopsis thaliana GN=NYC1 PE=1 SV=1
BnaC04G0380000NO	8.67333	13.5933	50.2333	1.90372	1.11e-05	Up	1.5455	0.00565336	Up	XP_013703001.1 prohibitin-3, mitochondrial [Brassica napus] &gt;XP_013712305.1 prohibitin-3, mitochondrial [Brassica napus] &gt;mitochondrial [Brassica napus] &gt;CDY42555.1 BnaA04g10580D [Brassica napus] &gt;CDY36378.1 BnaC04g32860D [Brassica napus] &gt;XP_013687023.1 prohibitin-3, mitochondrial [Brassica napus] &gt;CDY11712.1 BnaC06g13200D [Brassica napus]	GO:0005730;GO:0005739;GO:0005743;GO:0009733;GO:0071731;GO:0009723;GO:0016049;GO:0005737;GO:0005774;GO:0005794;GO:0016021;GO:0016020;GO:0005634;GO:0005886;GO:0007005;GO:0048527;GO:0009651;GO:0051301;GO:0005747;GO:0005773	nucleolus;mitochondrion;mitochondrial inner membrane;response to auxin;response to nitric oxide;response to ethylene;cell growth;cytoplasm;vacuolar membrane;Golgi apparatus;integral component of membrane;membrane;nucleus;plasma membrane;mitochondrion organization;lateral root development;response to salt stress;cell division;mitochondrial respiratory chain complex I;vacuole	K17080	PHB1	http://www.genome.jp/dbget-bin/www_bget?ko:K17080	-	-	KOG3090(O)(Prohibitin-like protein)	Prohibitin-3,	Prohibitin-3, mitochondrial OS=Arabidopsis thaliana GN=PHB3 PE=1 SV=1
BnaC04G0382100NO	3.82667	13.67	0.58	-3.4212	0.000129194	Down	-5.00349	1.44e-07	Down	allergen Che a 1-like [Brassica napus]	GO:0008150;GO:0003674;GO:0005576	biological_process;molecular_function;extracellular region	-	-	-	-	-	-	-	-
BnaC04G0382700NO	2.33667	10.39	0.4	-3.17994	0.00468304	Down	-5.11664	0.00410557	Down	[Brassica napus];phosphodiesterase GDPD2-like [Brassica napus]	GO:0008081;GO:0006629	phosphoric diester hydrolase activity;lipid metabolic process	-	-	-	-	-	KOG2421(R)(Predicted starch-binding protein)	Glycerophosphodiester	Glycerophosphodiester phosphodiesterase GDPD2 OS=Arabidopsis thaliana GN=GDPD2 PE=2 SV=1
BnaC04G0543600NO	36.4167	57.1133	3.46667	-3.95551	1.4e-10	Down	-4.38471	8.58e-09	Down	[Brassica napus];rhodanese-like domain-containing protein 9, chloroplastic isoform X1 [Brassica oleracea var. oleracea]	GO:0009535;GO:0008150;GO:0009507;GO:0016020;GO:0016021;GO:0003674;GO:0009536;GO:0009534	chloroplast thylakoid membrane;biological_process;chloroplast;membrane;integral component of membrane;molecular_function;plastid;chloroplast thylakoid	-	-	-	-	-	-	Rhodanese-like	Rhodanese-like domain-containing protein 9, chloroplastic OS=Arabidopsis thaliana GN=STR9 PE=2 SV=1
BnaC04G0570700NO	339.897	331.757	18.4533	-4.78848	3.08e-05	Down	-4.54768	0.000593927	Down	CURVATURE THYLAKOID 1B, chloroplastic-like [Brassica napus]	GO:0016021;GO:0016020;GO:0009579	integral component of membrane;membrane;thylakoid	-	-	-	-	-	-	Protein	Protein CURVATURE THYLAKOID 1B, chloroplastic OS=Arabidopsis thaliana GN=CURT1B PE=1 SV=2
BnaC04G0573800NO	0.0266667	0.156667	24.7433	9.14363	0.00270599	Up	6.97663	0.000112286	Up	transcription factor ERF071-like [Brassica napus]	GO:0003677;GO:0006355;GO:0006351;GO:0003700;GO:0005634	DNA binding;regulation of transcription, DNA-templated;transcription, DNA-templated;transcription factor activity, sequence-specific DNA binding;nucleus	K09286	EREBP	http://www.genome.jp/dbget-bin/www_bget?ko:K09286	-	-	-	Ethylene-responsive	Ethylene-responsive transcription factor ERF071 OS=Arabidopsis thaliana GN=ERF071 PE=2 SV=1
BnaC06G0102500NO	0.513333	2.08667	23.63	4.97506	8.04e-08	Up	3.16444	0.00319067	Up	protein DY000_00029900 [Brassica cretica];protein product [Brassica oleracea]	GO:0000166;GO:0003723;GO:0005524;GO:0004386;GO:0003676;GO:0005634;GO:0016787	nucleotide binding;RNA binding;ATP binding;helicase activity;nucleic acid binding;nucleus;hydrolase activity	K16911	DDX21	http://www.genome.jp/dbget-bin/www_bget?ko:K16911	-	-	-	DEAD-box	DEAD-box ATP-dependent RNA helicase 7 OS=Arabidopsis thaliana GN=RH7 PE=1 SV=2
BnaC06G0111600NO	0.03	0.0533333	4.35	6.46049	0.000694209	Up	5.94636	0.00219848	Up	protein product [Brassica oleracea]	-	-	K19476	IST1	http://www.genome.jp/dbget-bin/www_bget?ko:K19476	Endocytosis	ko04144	-	-	-
BnaC06G0131400NO	1507.89	1537.2	390.327	-2.60253	5.03e-16	Down	-2.35372	1.47e-08	Down	CDY26092.1 BnaC06g11040D [Brassica napus];I reaction center subunit V, chloroplastic [Brassica napus] &gt	GO:0030093;GO:0009534;GO:0016168;GO:0009773;GO:0042550;GO:0015979;GO:0009579;GO:0016020;GO:0016021;GO:0050821;GO:0009522;GO:0009535;GO:0009941;GO:0009507;GO:0009780	chloroplast photosystem I;chloroplast thylakoid;chlorophyll binding;photosynthetic electron transport in photosystem I;photosystem I stabilization;photosynthesis;thylakoid;membrane;integral component of membrane;protein stabilization;photosystem I;chloroplast thylakoid membrane;chloroplast envelope;chloroplast;photosynthetic NADP+ reduction	K08905	psaG	http://www.genome.jp/dbget-bin/www_bget?ko:K08905	Photosynthesis	ko00195	-	Photosystem	Photosystem I reaction center subunit V, chloroplastic OS=Arabidopsis thaliana GN=PSAG PE=2 SV=1
BnaC06G0300700NO	2.24333	8.17667	0.96	-2.08906	0.000113829	Down	-3.58936	2.16e-11	Down	protein NRT1/ PTR FAMILY 3.1-like [Brassica oleracea var. oleracea]	GO:0016020;GO:0016021;GO:0006810;GO:0005215	membrane;integral component of membrane;transport;transporter activity	-	-	-	-	-	-	Protein	Protein NRT1/ PTR FAMILY 3.1 OS=Arabidopsis thaliana GN=NPF3.1 PE=2 SV=1
BnaC06G0301400NO	9.32667	160.307	2.82	-2.41287	0.000525443	Down	-6.16023	6.99e-40	Down	zinc finger protein CONSTANS-LIKE 6-like [Brassica oleracea var. oleracea]	GO:0008270;GO:0005622	zinc ion binding;intracellular	-	-	-	-	-	-	Zinc	Zinc finger protein CONSTANS-LIKE 6 OS=Arabidopsis thaliana GN=COL6 PE=2 SV=2
BnaC06G0303600NO	2.93	11.7267	0.843333	-2.4709	0.00421833	Down	-4.13271	8.28e-17	Down	putative zinc finger protein At1g68190 [Brassica oleracea var. oleracea] &gt;XP_013731634.1 putative zinc finger protein At1g68190 [Brassica napus]	GO:0005622;GO:0008270	intracellular;zinc ion binding	-	-	-	-	-	-	Putative	Putative zinc finger protein At1g68190 OS=Arabidopsis thaliana GN=At1g68190 PE=2 SV=1
BnaC06G0306500NO	15.8467	46.4433	8.99667	-1.47553	1.57e-07	Down	-2.70058	1.42e-06	Down	protein product [Brassica oleracea]	-	-	-	-	-	-	-	-	BTB/POZ	BTB/POZ domain-containing protein At1g67900 OS=Arabidopsis thaliana GN=At1g67900 PE=1 SV=1
BnaC06G0308500NO	959.157	804.61	203.52	-2.91531	9.57e-11	Down	-2.34406	4.8e-07	Down	[Brassica napus]	-	-	K02723	psbY	http://www.genome.jp/dbget-bin/www_bget?ko:K02723	Photosynthesis	ko00195	-	Photosystem	Photosystem II core complex proteins psbY, chloroplastic OS=Spinacia oleracea GN=PSBY PE=1 SV=2
BnaC06G0341900NO	0.533333	1.17667	5.62333	2.70737	0.000732041	Up	1.91693	0.0033518	Up	[Brassica napus];DNA (cytosine-5)-methyltransferase DRM1 [Brassica rapa] &gt;XP_018508891.1 PREDICTED: DNA (cytosine-5)-methyltransferase DRM1 [Brassica rapa]	-	-	-	-	-	-	-	-	DNA	DNA (cytosine-5)-methyltransferase DRM1 OS=Arabidopsis thaliana GN=DRM1 PE=3 SV=2
BnaC07G0439900NO	58.7633	62.6233	31.3433	-1.56419	1.89e-07	Down	-1.38308	0.00561297	Down	magnesium protoporphyrin IX methyltransferase, chloroplastic [Brassica oleracea var. oleracea]	GO:0015995;GO:0046406	chlorophyll biosynthetic process;magnesium protoporphyrin IX methyltransferase activity	K03428	bchM,chlM	http://www.genome.jp/dbget-bin/www_bget?ko:K03428	Porphyrin and chlorophyll metabolism	ko00860	-	Magnesium	Magnesium protoporphyrin IX methyltransferase, chloroplastic OS=Arabidopsis thaliana GN=CHLM PE=1 SV=1
BnaC07G0442100NO	1.11	0.26	15.2267	3.1388	3.43e-06	Up	5.49647	5.56e-10	Up	uncharacterized protein LOC103861547 [Brassica rapa]	GO:0003682	chromatin binding	-	-	-	-	-	-	-	-
BnaC07G0442200NO	1.91	3.06667	17.1	2.51876	3.84e-07	Up	2.11721	7.82e-06	Up	peptidyl-prolyl cis-trans isomerase FKBP53 [Brassica oleracea var. oleracea]	GO:0003755;GO:0006457;GO:0016853	peptidyl-prolyl cis-trans isomerase activity;protein folding;isomerase activity	K14826	FPR3_4	http://www.genome.jp/dbget-bin/www_bget?ko:K14826	-	-	KOG0544(O)(FKBP-type peptidyl-prolyl cis-trans isomerase)	Peptidyl-prolyl	Peptidyl-prolyl cis-trans isomerase FKBP53 OS=Arabidopsis thaliana GN=FKBP53 PE=1 SV=1
BnaC07G0451500NO	4.39333	2.09	20.3467	1.54781	0.00398594	Up	2.9379	1.81e-07	Up	protein product [Brassica oleracea]	GO:0005739;GO:0000774;GO:0042803;GO:0005759;GO:0051087;GO:0006457	mitochondrion;adenyl-nucleotide exchange factor activity;protein homodimerization activity;mitochondrial matrix;chaperone binding;protein folding	K03687	GRPE	http://www.genome.jp/dbget-bin/www_bget?ko:K03687	-	-	KOG3003(O)(Molecular chaperone of the GrpE family)	Protein	Protein GrpE OS=Nitrobacter winogradskyi (strain ATCC 25391 / DSM 10237 / CIP 104748 / NCIMB 11846 / Nb-255) GN=grpE PE=3 SV=1
BnaC07G0454600NO	25.44	81.0733	4.76	-3.10637	0.000196381	Down	-4.52073	1.15e-06	Down	protein product [Brassica oleracea]	GO:0008270;GO:0016021;GO:0016020;GO:0046872	zinc ion binding;integral component of membrane;membrane;metal ion binding	K00218;K10666	E1.3.1.33,por;RNF5	http://www.genome.jp/dbget-bin/www_bget?ko:K00218;http://www.genome.jp/dbget-bin/www_bget?ko:K10666	Porphyrin and chlorophyll metabolism;Protein processing in endoplasmic reticulum	ko00860,ko04141	KOG1208(Q)(Dehydrogenases with different specificities (related to short-chain alcohol dehydrogenases));KOG0823(O)(Predicted E3 ubiquitin ligase)	E3;Protochlorophyllide	E3 ubiquitin-protein ligase RMA3 OS=Arabidopsis thaliana GN=RMA3 PE=1 SV=1;Protochlorophyllide reductase B, chloroplastic OS=Arabidopsis thaliana GN=PORB PE=1 SV=3
BnaC07G0456900NO	81.61	118.89	50.95	-1.34127	0.000344035	Down	-1.57971	2.29e-06	Down	phosphatase 2C 57-like [Brassica napus]	GO:0004721;GO:0046872;GO:0003824;GO:0004722;GO:0016787;GO:0043169;GO:0006470	phosphoprotein phosphatase activity;metal ion binding;catalytic activity;protein serine/threonine phosphatase activity;hydrolase activity;cation binding;protein dephosphorylation	-	-	-	-	-	KOG0697(T)(Protein phosphatase 1B (formerly 2C));KOG0698(T)(Serine/threonine protein phosphatase)	Protein	Protein phosphatase 2C 57 OS=Arabidopsis thaliana GN=PPH1 PE=1 SV=2
BnaC07G0470200NO	139.643	179.903	28.48	-2.95155	6.01e-07	Down	-2.9831	0.00299673	Down	CDY46717.1 BnaC07g42220D [Brassica napus];protein BNAC07G42220D [Brassica napus] &gt	-	-	-	-	-	-	-	-	-	-
BnaC07G0479300NO	0.723333	1.57333	8.43667	2.90241	7.92e-08	Up	2.10062	0.000145414	Up	protein arginine N-methyltransferase 1.5 [Brassica oleracea var. oleracea]	GO:0006479;GO:0032259;GO:0008168;GO:0016740;GO:0035246	protein methylation;methylation;methyltransferase activity;transferase activity;peptidyl-arginine N-methylation	K02516	PRMT5,HSL7	http://www.genome.jp/dbget-bin/www_bget?ko:K02516	RNA transport	ko03013	KOG0822(D)(Protein kinase inhibitor)	Protein	Protein arginine N-methyltransferase 1.5 OS=Arabidopsis thaliana GN=PMRT15 PE=1 SV=2
BnaC07G0479800NO	2.01333	2.37333	16.88	2.79708	9.29e-07	Up	2.50249	4.58e-05	Up	protein product [Brassica oleracea]	-	-	-	-	-	-	-	KOG1956(L)(DNA topoisomerase III alpha)	DNA	DNA topoisomerase 1 OS=Rickettsia felis (strain ATCC VR-1525 / URRWXCal2) GN=topA PE=3 SV=1
BnaC07G0481400NO	4.75667	6.52333	1.76	-2.08459	0.000301393	Down	-2.24021	4.94e-05	Down	uncharacterized protein LOC106303850 [Brassica oleracea var. oleracea]	-	-	-	-	-	-	-	-	-	-
BnaC07G0481600NO	21.72	23.41	10.9233	-1.65178	2.5e-06	Down	-1.46478	3.55e-05	Down	[Brassica napus]	-	-	-	-	-	-	-	-	Protein;Uncharacterized	Protein TIC 62, chloroplastic OS=Arabidopsis thaliana GN=TIC62 PE=1 SV=1;Uncharacterized protein At5g02240 OS=Arabidopsis thaliana GN=At5g02240 PE=1 SV=1
BnaC07G0497800NO	0.21	0.0866667	13.5233	5.3942	1.16e-09	Up	6.96916	1.29e-09	Up	protein DY000_00000822 [Brassica cretica];protein product [Brassica oleracea];arginine--tRNA ligase, chloroplastic/mitochondrial-like [Brassica oleracea var. oleracea]	GO:0006418;GO:0005739;GO:0004814;GO:0016874;GO:0005524;GO:0005737;GO:0009536;GO:0009570;GO:0000166;GO:0004812;GO:0009793;GO:0006412;GO:0006420;GO:0005829;GO:0009507	tRNA aminoacylation for protein translation;mitochondrion;arginine-tRNA ligase activity;ligase activity;ATP binding;cytoplasm;plastid;chloroplast stroma;nucleotide binding;aminoacyl-tRNA ligase activity;embryo development ending in seed dormancy;translation;arginyl-tRNA aminoacylation;cytosol;chloroplast	K01887	RARS,argS	http://www.genome.jp/dbget-bin/www_bget?ko:K01887	Aminoacyl-tRNA biosynthesis	ko00970	-	Arginine--tRNA	Arginine--tRNA ligase, chloroplastic/mitochondrial OS=Arabidopsis thaliana GN=EMB1027 PE=1 SV=1
BnaC07G0499900NO	5.78	10.12	2.40667	-1.93474	0.00413617	Down	-2.46005	0.000200904	Down	BOI-related E3 ubiquitin-protein ligase 2 [Brassica napus]	-	-	K19042	BOI	http://www.genome.jp/dbget-bin/www_bget?ko:K19042	-	-	-	Probable	Probable BOI-related E3 ubiquitin-protein ligase 3 OS=Arabidopsis thaliana GN=BRG3 PE=1 SV=1
BnaC07G0500000NO	279.76	445.973	134.84	-1.72556	0.00176065	Down	-2.05235	0.0037808	Down	isoform X1 [Eutrema salsugineum];[Brassica napus]	GO:0004096;GO:0020037;GO:0042744;GO:0046872;GO:0016491;GO:0004601;GO:0006979;GO:0055114	catalase activity;heme binding;hydrogen peroxide catabolic process;metal ion binding;oxidoreductase activity;peroxidase activity;response to oxidative stress;oxidation-reduction process	K03781	katE,CAT,catB,srpA	http://www.genome.jp/dbget-bin/www_bget?ko:K03781	Peroxisome;MAPK signaling pathway - plant;Tryptophan metabolism;Glyoxylate and dicarboxylate metabolism;Carbon metabolism	ko04146,ko04016,ko00380,ko00630,ko01200	KOG0047(P)(Catalase)	Catalase-2	Catalase-2 OS=Arabidopsis thaliana GN=CAT2 PE=2 SV=3
BnaC07G0506700NO	0.446667	0.243333	4.6	2.79817	0.00202802	Up	3.99062	6.75e-06	Up	23-monooxygenase [Brassica napus] &gt;CDY64922.1 BnaAnng19730D [Brassica napus]	GO:0046872;GO:0016491;GO:0016020;GO:0055114;GO:0016021;GO:0016705;GO:0020037;GO:0005506;GO:0004497	metal ion binding;oxidoreductase activity;membrane;oxidation-reduction process;integral component of membrane;oxidoreductase activity, acting on paired donors, with incorporation or reduction of molecular oxygen;heme binding;iron ion binding;monooxygenase activity	K12637	CYP90C1,ROT3	http://www.genome.jp/dbget-bin/www_bget?ko:K12637	Brassinosteroid biosynthesis	ko00905	-	3-epi-6-deoxocathasterone	3-epi-6-deoxocathasterone 23-monooxygenase OS=Arabidopsis thaliana GN=ROT3 PE=2 SV=3
BnaC07G0521100NO	1056.05	1147.73	669.75	-1.31619	0.000277091	Down	-1.13274	0.00170217	Down	probable fructose-bisphosphate aldolase 2, chloroplastic [Brassica oleracea var. oleracea]	GO:0006096;GO:0016829;GO:0003824;GO:0004332	glycolytic process;lyase activity;catalytic activity;fructose-bisphosphate aldolase activity	K01623	ALDO	http://www.genome.jp/dbget-bin/www_bget?ko:K01623	Fructose and mannose metabolism;Glycolysis / Gluconeogenesis;Pentose phosphate pathway;Carbon fixation in photosynthetic organisms;Biosynthesis of amino acids;Carbon metabolism	ko00051,ko00010,ko00030,ko00710,ko01230,ko01200	KOG1557(G)(Fructose-biphosphate aldolase)	Fructose-bisphosphate	Fructose-bisphosphate aldolase 2, chloroplastic OS=Arabidopsis thaliana GN=FBA2 PE=1 SV=2
BnaC07G0522700NO	0.496667	1.52	5.47	2.81847	1.06e-08	Up	1.47571	0.00480139	Up	protein LOC106410131 [Brassica napus];protein product [Brassica oleracea]	-	-	K14311	NUP188	http://www.genome.jp/dbget-bin/www_bget?ko:K14311	RNA transport	ko03013	-	Nucleoporin	Nucleoporin NUP188 homolog OS=Homo sapiens GN=NUP188 PE=1 SV=1
Genes in red font represent the most likely candidates responsible for the albino phenotype of WL
